# Supplementary material for: DFT-based force field development for noble gas adsorption in metal organic frameworks
Source: Royal Society of Chemistry journal article supplement (doi:10.1039/c5ta06201b), 2015-01-01
Supplement: c5ta06201b1.pdf [file c5ta06201b1.pdf]

## DFT based Force Field Development for Noble Gas Adsorption in Metal Organic Frameworks

### Supplementary Information

Hakan Demir <sup>a</sup>, Jeffery A. Greathouse <sup>b</sup>, Chad L. Staiger <sup>c</sup>, John J. Perry IV <sup>d</sup> and Mark D. Allendorf <sup>d</sup>, David S. Sholl <sup>a</sup>

<sup>a</sup>School of Chemical and Biomolecular Engineering, Georgia Institute of Technology, 311 Ferst Drive NW, Atlanta, Georgia 30332-0100

<sup>b</sup>Geochemistry Department, Sandia National Laboratories, P.O. Box 5800, Albuquerque, New Mexico 87185, USA.

<sup>c</sup>Materials, Devices, and Energy Technologies Department, Sandia National Laboratories, P.O. Box 5800, Albuquerque, New Mexico 87185, USA.

<sup>d</sup>Energy Nanomaterials Department, Sandia National Laboratories, P.O. Box 969, Livermore, California 94551, USA

**Table S1.** Derived force field parameters for Co-MOF-74

| Co-MOF-74    | PBE-D2               |                      | vdW-DF               |                      | vdW-DF2              |                      |
|--------------|----------------------|----------------------|----------------------|----------------------|----------------------|----------------------|
|              | $\epsilon(\text{K})$ | $\sigma(\text{\AA})$ | $\epsilon(\text{K})$ | $\sigma(\text{\AA})$ | $\epsilon(\text{K})$ | $\sigma(\text{\AA})$ |
| <b>H-Ar</b>  | 3.328                | 3.297                | 379.310              | 2.828                | 52.354               | 2.832                |
| <b>C-Ar</b>  | 38.439               | 3.474                | 52.363               | 3.565                | 53.618               | 3.470                |
| <b>O-Ar</b>  | 74.654               | 3.248                | 108.820              | 3.297                | 164.836              | 3.120                |
| <b>Co-Ar</b> | 154.778              | 3.109                | 204.131              | 3.207                | 50.980               | 3.412                |
| <b>H-Xe</b>  | 111.070              | 3.045                | 515.951              | 2.902                | 67.529               | 3.127                |
| <b>C-Xe</b>  | 50.569               | 3.746                | 113.012              | 3.764                | 85.467               | 3.754                |
| <b>O-Xe</b>  | 126.058              | 3.435                | 16.351               | 4.190                | 172.063              | 3.436                |
| <b>Co-Xe</b> | 696.420              | 3.011                | 708.156              | 3.024                | 35.506               | 3.631                |

**Table S2.** Derived force field parameters for Ni-MOF-74

| <b>Ni-MOF-74</b> | <b>PBE-D2</b>        |                      | <b>vdW-DF</b>        |                      | <b>vdW-DF2</b>       |                      |
|------------------|----------------------|----------------------|----------------------|----------------------|----------------------|----------------------|
|                  | $\epsilon(\text{K})$ | $\sigma(\text{\AA})$ | $\epsilon(\text{K})$ | $\sigma(\text{\AA})$ | $\epsilon(\text{K})$ | $\sigma(\text{\AA})$ |
| <b>H-Ar</b>      | 82.761               | 2.781                | 556.072              | 2.764                | 96.614               | 2.706                |
| <b>C-Ar</b>      | 59.596               | 3.415                | 22.316               | 3.780                | 62.023               | 3.439                |
| <b>O-Ar</b>      | 40.741               | 3.412                | 134.217              | 3.281                | 134.661              | 3.154                |
| <b>Ni-Ar</b>     | 249.157              | 3.117                | 239.552              | 3.135                | 51.918               | 3.461                |
| <b>H-Xe</b>      | 165.573              | 2.950                | 465.085              | 2.950                | 206.695              | 2.926                |
| <b>C-Xe</b>      | 92.418               | 3.618                | 136.303              | 3.742                | 55.579               | 3.863                |
| <b>O-Xe</b>      | 59.839               | 3.616                | 6.516                | 4.487                | 136.081              | 3.488                |
| <b>Ni-Xe</b>     | 426.137              | 3.169                | 365.972              | 3.261                | 172.595              | 3.453                |

**Table S3.** Derived force field parameters for Zn-MOF-74

| <b>Zn-MOF-74</b> | <b>PBE-D2</b>        |                      | <b>vdW-DF</b>        |                      | <b>vdW-DF2</b>       |                      |
|------------------|----------------------|----------------------|----------------------|----------------------|----------------------|----------------------|
|                  | $\epsilon(\text{K})$ | $\sigma(\text{\AA})$ | $\epsilon(\text{K})$ | $\sigma(\text{\AA})$ | $\epsilon(\text{K})$ | $\sigma(\text{\AA})$ |
| <b>H-Ar</b>      | 36.141               | 2.957                | 106.027              | 3.021                | 40.066               | 2.907                |
| <b>C-Ar</b>      | 42.925               | 3.461                | 107.438              | 3.441                | 39.934               | 3.518                |
| <b>O-Ar</b>      | 71.147               | 3.300                | 133.997              | 3.229                | 147.642              | 3.171                |
| <b>Zn-Ar</b>     | 420.107              | 2.901                | 80.596               | 3.311                | 294.334              | 2.982                |
| <b>H-Xe</b>      | 67.693               | 3.113                | 61.470               | 3.348                | 52.803               | 3.245                |
| <b>C-Xe</b>      | 93.532               | 3.576                | 150.958              | 3.663                | 60.448               | 3.772                |
| <b>O-Xe</b>      | 51.566               | 3.697                | 144.520              | 3.553                | 105.028              | 3.592                |
| <b>Zn-Xe</b>     | 935.898              | 2.959                | 26.229               | 3.825                | 667.784              | 3.090                |

**Table S4.** Derived force field parameters for Mg-MOF-74

| Mg-MOF-74    | PBE-D2               |                      | vdW-DF               |                      | vdW-DF2              |                      |
|--------------|----------------------|----------------------|----------------------|----------------------|----------------------|----------------------|
|              | $\epsilon(\text{K})$ | $\sigma(\text{\AA})$ | $\epsilon(\text{K})$ | $\sigma(\text{\AA})$ | $\epsilon(\text{K})$ | $\sigma(\text{\AA})$ |
| <b>H-Ar</b>  | 37.171               | 2.943                | 289.769              | 2.923                | 3.345                | 3.534                |
| <b>C-Ar</b>  | 41.524               | 3.487                | 56.289               | 3.513                | 48.664               | 3.476                |
| <b>O-Ar</b>  | 62.350               | 3.330                | 116.701              | 3.299                | 161.272              | 3.146                |
| <b>Mg-Ar</b> | 500.749              | 2.785                | 332.103              | 2.971                | 217.239              | 2.982                |
| <b>H-Xe</b>  | 62.490               | 3.155                | 57.441               | 3.372                | 47.666               | 3.301                |
| <b>C-Xe</b>  | 68.506               | 3.659                | 155.331              | 3.658                | 57.711               | 3.796                |
| <b>O-Xe</b>  | 52.662               | 3.651                | 100.188              | 3.629                | 114.757              | 3.564                |
| <b>Mg-Xe</b> | 961.205              | 2.969                | 82.051               | 3.565                | 539.425              | 3.157                |

**Table S5.** Derived force field parameters for ZIF-8

| ZIF-8        | PBE-D2               |                      | vdW-DF               |                      | vdW-DF2              |                      |
|--------------|----------------------|----------------------|----------------------|----------------------|----------------------|----------------------|
|              | $\epsilon(\text{K})$ | $\sigma(\text{\AA})$ | $\epsilon(\text{K})$ | $\sigma(\text{\AA})$ | $\epsilon(\text{K})$ | $\sigma(\text{\AA})$ |
| <b>H-Ar</b>  | 110.679              | 2.647                | 52.469               | 3.054                | 176.008              | 2.616                |
| <b>C-Ar</b>  | 22.864               | 3.761                | 59.430               | 3.594                | 29.188               | 3.723                |
| <b>N-Ar</b>  | 374.859              | 2.387                | 601.377              | 2.515                | 166.353              | 2.411                |
| <b>Zn-Ar</b> | 107.188              | 2.813                | 107.894              | 4.756                | 107.188              | 2.813                |
| <b>H-Xe</b>  | 131.705              | 2.995                | 31.717               | 3.367                | 183.048              | 2.941                |
| <b>C-Xe</b>  | 23.440               | 4.085                | 44.810               | 4.116                | 35.907               | 4.139                |
| <b>N-Xe</b>  | 681.114              | 2.831                | 1617.740             | 2.534                | 1342.592             | 2.293                |
| <b>Zn-Xe</b> | 162.483              | 3.067                | 231.913              | 5.036                | 162.483              | 3.067                |

**Table S6.** Derived force field parameters for Cu-BTC

| Cu-BTC       | PBE-D2               |                      | vdW-DF               |                      | vdW-DF2              |                      |
|--------------|----------------------|----------------------|----------------------|----------------------|----------------------|----------------------|
|              | $\epsilon(\text{K})$ | $\sigma(\text{\AA})$ | $\epsilon(\text{K})$ | $\sigma(\text{\AA})$ | $\epsilon(\text{K})$ | $\sigma(\text{\AA})$ |
| <b>H-Ar</b>  | 43.364               | 2.784                | 272.412              | 2.819                | 101.287              | 2.623                |
| <b>C-Ar</b>  | 52.327               | 3.433                | 80.119               | 3.459                | 76.827               | 3.390                |
| <b>O-Ar</b>  | 57.899               | 3.306                | 54.718               | 3.462                | 68.363               | 3.282                |
| <b>Cu-Ar</b> | 254.085              | 2.881                | 332.408              | 2.911                | 142.607              | 2.740                |
| <b>H-Xe</b>  | 113.358              | 3.009                | 65.349               | 3.336                | 258.391              | 2.911                |
| <b>C-Xe</b>  | 81.649               | 3.620                | 134.442              | 3.729                | 113.761              | 3.705                |
| <b>O-Xe</b>  | 101.198              | 3.481                | 73.826               | 3.729                | 13.585               | 4.145                |
| <b>Cu-Xe</b> | 600.874              | 2.948                | 656.345              | 3.035                | 727.904              | 2.857                |

**Table S7. Comparison of cell parameters of experimental and optimized structures**

|                  | CoRE (CSD) MOF/Equivalent CoRE (CSD) MOF/Optimized structure (PBE-D2, vdW-DF, vdW-DF2) |                                    |                                    |                                         |                                         |                                         |
|------------------|----------------------------------------------------------------------------------------|------------------------------------|------------------------------------|-----------------------------------------|-----------------------------------------|-----------------------------------------|
|                  | a                                                                                      | b                                  | c                                  | $\alpha$                                | $\beta$                                 | $\gamma$                                |
| <b>Co-MOF-74</b> | 6.806/15.116/14.737-14.988-15.047                                                      | 15.116/15.116/14.735-14.979-15.028 | 15.116/6.806/6.490-6.510-6.540     | 62.211/81.368/81.567-81.662-81.652      | 81.368/81.368/81.547-81.666-81.658      | 98.632/117.789/117.893-117.885-117.846  |
| <b>Mg-MOF-74</b> | 6.759/15.194/15.220-15.343-15.345                                                      | 15.194/15.194/15.211-15.337-15.340 | 15.194/6.759/6.872-6.988-6.979     | 62.159/81.473/81.338-81.253-81.270      | 81.473/81.473/81.336-81.258-81.269      | 98.527/117.841/117.860-117.708-117.723  |
| <b>Ni-MOF-74</b> | 6.770/15.057/14.961-15.198-15.196                                                      | 15.057/15.057/14.964-15.212-15.199 | 15.057/6.770/6.189-6.201-6.251     | 62.205/81.380/82.034-82.194-82.130      | 81.380/81.380/82.103-82.150-82.083      | 98.620/117.795/118.105-118.191-118.133  |
| <b>Zn-MOF-74</b> | 6.628/15.099/15.196-15.318                                                             | 15.099/15.099/15.217-15.370-15.343 | 15.099/6.628/6.956-7.012-7.047     | 62.103/81.586/81.259-81.286-81.205      | 81.586/81.586/81.209-81.170-81.135      | 98.414/117.897/117.684-117.613-117.581  |
| <b>Cu-BTC</b>    | 18.627/18.627/18.738-18.914-18.929                                                     | 18.627/18.627/18.738-18.914-18.929 | 18.627/18.627/18.738-18.914-18.929 | 60.000/60.000/60.009-60.003-59.996      | 60.000/60.000/60.009-60.003-59.996      | 60.000/60.000/60.009-60.003-59.996      |
| <b>ZIF-8</b>     | 14.714/14.714/14.657-14.928-14.911                                                     | 14.714/14.714/14.662-14.940-14.923 | 14.714/14.714/14.656-14.928-14.910 | 109.471/109.471/109.456-109.487-109.489 | 109.471/109.471/109.496-109.393-109.399 | 109.471/109.471/109.456-109.487-109.489 |

**Table S8.** Simulated, experimental surface areas and deviations from experimental surface areas

| SA(m <sup>2</sup> /g) | PBE-D2 | vdW-DF | vdW-DF2 | Experimental | Perc. Dev. (%) | Perc. Dev. (%) | Perc. Dev. (%) |
|-----------------------|--------|--------|---------|--------------|----------------|----------------|----------------|
| <b>Co-MOF-74</b>      | 1123   | 1178   | 1191    | 1292         | 13             | 9              | 8              |
| <b>Mg-MOF-74</b>      | 1691   | 1744   | 1748    | 1530         | -11            | -14            | -14            |
| <b>Ni-MOF-74</b>      | 1118   | 1151   | 1161    | 1199         | 7              | 4              | 3              |
| <b>Zn-MOF-74</b>      | 1304   | 1337   | 1343    | 973          | -34            | -37            | -38            |
| <b>Cu-BTC</b>         | 2198   | 2285   | 2292    | 1603         | -37            | -43            | -43            |
| <b>ZIF-8</b>          | 1314   | 1430   | 1422    | 1391         | 6              | -3             | -2             |

**Table S9.** Normalized absolute adsorption amount differences with respect to experiments at 1 bar

| 1bar           | PBE-D2       | vdW-DF       | vdW-DF2      | UFF          |
|----------------|--------------|--------------|--------------|--------------|
| Ar-Zn-MOF-74   | 0.551        | 11.013       | 2.030        | 0.312        |
| Xe-Zn-MOF-74   | 0.791        | 0.964        | 0.613        | 0.222        |
| Ar-Ni-MOF-74   | 0.116        | 5.400        | 0.550        | 0.246        |
| Xe-Ni-MOF-74   | 0.082        | 0.259        | 0.031        | 0.154        |
| Ar-Co-MOF-74   | 0.590        | 6.690        | 0.836        | 0.080        |
| Xe-Co-MOF-74   | 0.034        | 0.062        | 0.088        | 0.271        |
| Ar-Mg-MOF-74   | 0.268        | 9.174        | 1.917        | 0.298        |
| Xe-Mg-MOF-74   | 0.548        | 0.768        | 0.453        | 0.225        |
| Ar-ZIF-8       | 0.373        | 6.125        | 0.448        | 1.216        |
| Ar-Cu-BTC      | 0.351        | 6.261        | 0.688        | 0.388        |
| <b>Average</b> | <b>0.370</b> | <b>4.672</b> | <b>0.765</b> | <b>0.341</b> |
| St.dev         | 0.237        | 3.734        | 0.648        | 0.303        |

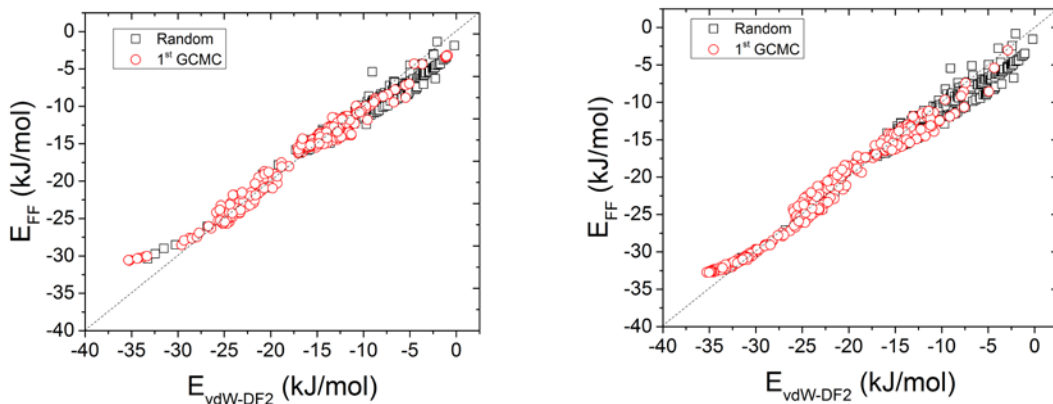

**Figure S1.** Comparison of vdW-DF2 and fitted FF binding energies for Xe-HKUST-1 (GCMC configurations generated at 100 (left) and 1 bar (right)).

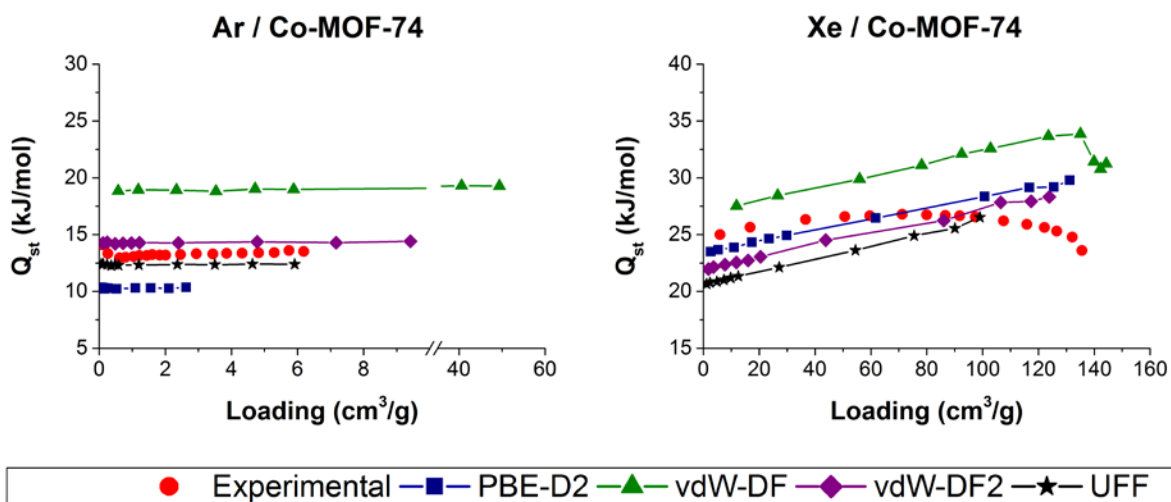

**Figure S2.** Heat of adsorption values calculated at 292 K for Ar and Xe adsorption in Co-MOF-74

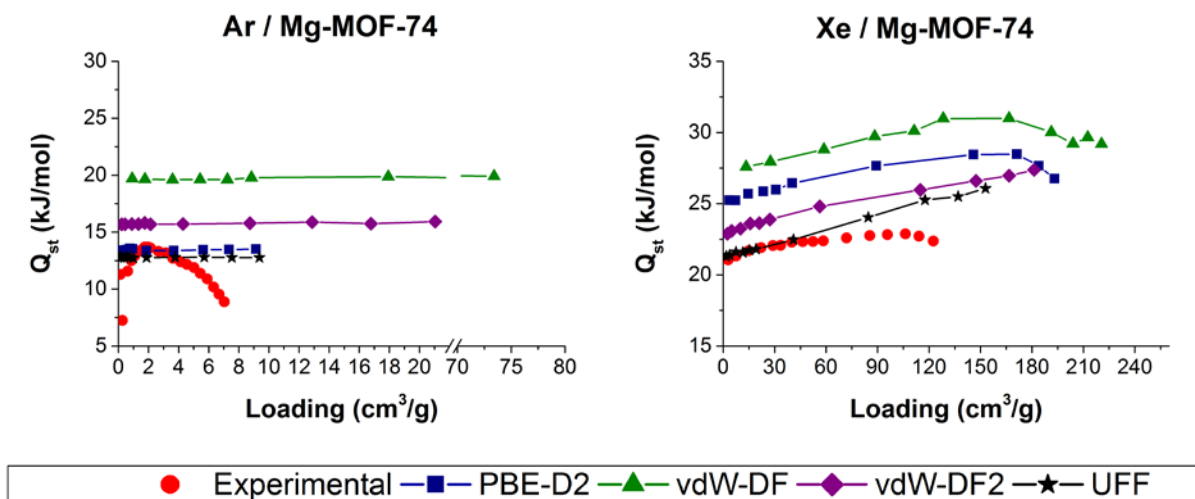

**Figure S3.** Heat of adsorption values calculated at 292 K for Ar and Xe adsorption in Mg-MOF-74

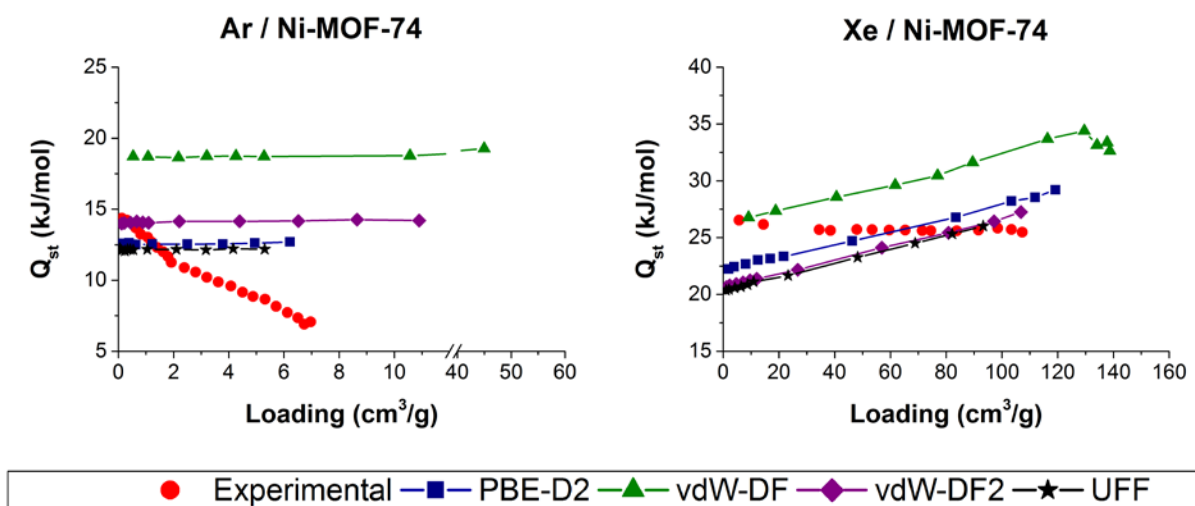

**Figure S4.** Heat of adsorption values calculated at 292 K for Ar and Xe adsorption in Ni-MOF-74

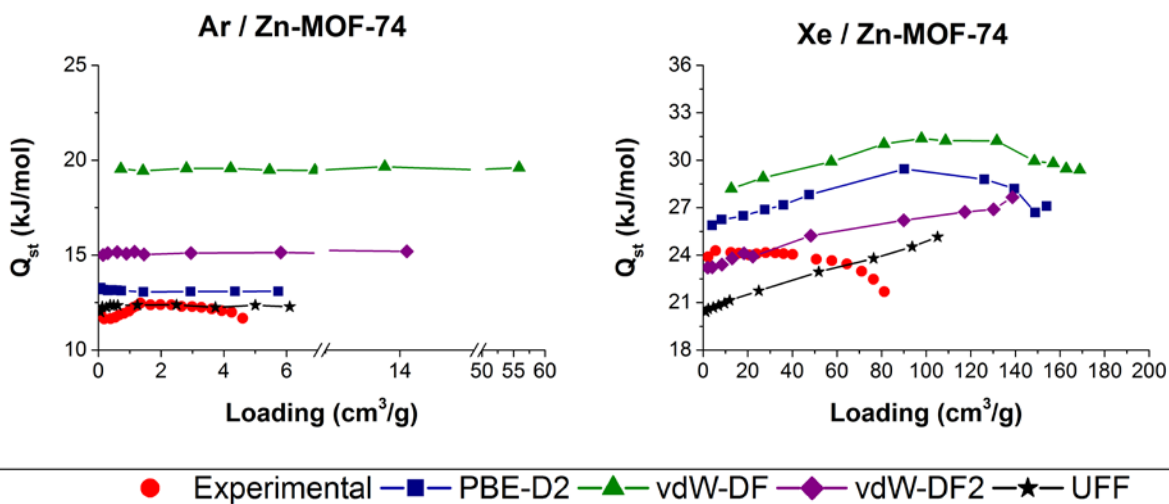

**Figure S5.** Heat of adsorption values calculated at 292 K for Ar and Xe adsorption in Zn-MOF-74

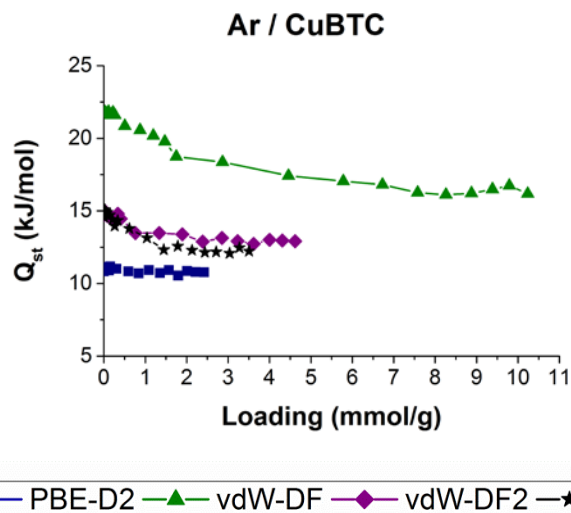

**Figure S6.** Heat of adsorption values for Ar-Cu-BTC at 308 K



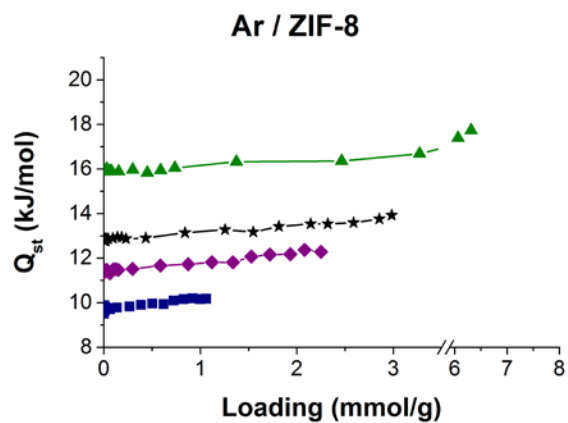

—■— PBE-D2 —▲— vdW-DF —◆— vdW-DF2 —★— UFF

**Figure S7.** Heat of adsorption values for Ar-ZIF-8 at 308 K

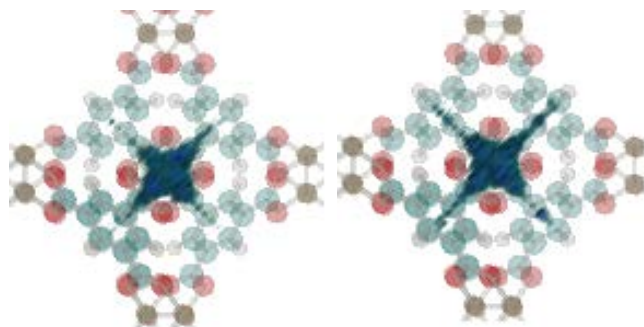

**Figure S8.** Density plots for Xe adsorption in Cu-BTC using PBE-D2 based FF at 308 K 0.01 bar (left) and 0.1bar (right) (Framework drawn transparent for adsorbate clarity).

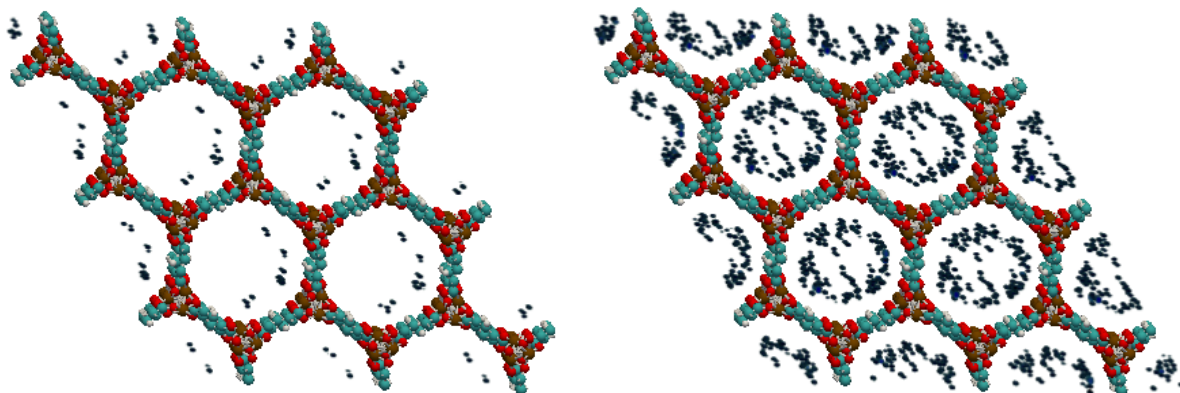

**Figure S9.** Density plots for Ar adsorption in Co-MOF-74 using PBE-D2 based FF at 292 K and pressures of  $10^{-4}$  bar (left) and  $10^{-3}$  bar (right).

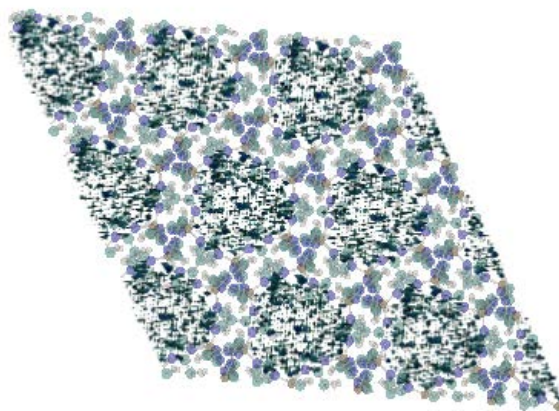

**Figure S10.** Density plots for Ar adsorption in ZIF-8 using PBE-D2 based FF at 308 K and 0.1 bar (Framework drawn transparent for adsorbate clarity).
